# Supplementary material for: Valorization of Fine Recycled Aggregates Contaminated with Gypsum Residues: Characterization and Evaluation of the Risk for Secondary Ettringite Formation
Source: MDPI journal article supplement (doi:10.3390/ma13214866), 2020-10-30
Supplement: s1 [file s1]

Supplementary Information

# Valorization of Fine Recycled Aggregates Contaminated with Gypsum Residues: Characterization and Evaluation of the Risk for Secondary Ettringite Formation

Charlotte Colman <sup>1,2,\*</sup>, David Bulteel <sup>1</sup>, Sébastien Rémond <sup>3</sup>, Zengfeng Zhao <sup>2</sup> and Luc Courard <sup>2</sup>

<sup>1</sup> Laboratoire de Génie Civil et géo-Environnement, Université de Lille, IMT Lille Douai, ULR 4515 - LGCgE, F-59000 Lille, France; david.bulteel@imt-lille-douai.fr

<sup>2</sup> Urban and Environmental Engineering, GeMMe Building Materials, University of Liège, 4000 Liège, Belgium; zengfeng.zhao@uliege.be (Z.Z.); luc.courard@uliege.be (L.C.)

<sup>3</sup> Université d'Orléans, Université de Tours, INSA CVL, EA 7494 LaMé, France; sebastien.remond@univ-orleans.fr

\* Correspondence: charlotte.colman@uliege.be

Received: 2 October 2020; Accepted: 26 October 2020; Published: date

**Table S1.** T-test results of the swelling curves. A red color means that samples differed significantly from each other for  $p < 0.05$ .

|           | A-<br>0.19% | B-<br>0.08% | C-<br>0.29% | D-<br>0.62% | E-<br>0.61% | F-<br>0.18% | REF-<br>0.47% | REF-<br>3.08% | NS-<br>0.29% |
|-----------|-------------|-------------|-------------|-------------|-------------|-------------|---------------|---------------|--------------|
| A-0.19%   |             |             |             |             |             |             |               |               |              |
| B-0.08%   |             |             |             |             |             |             |               |               |              |
| C-0.29%   |             |             |             |             |             |             |               |               |              |
| D-0.62%   |             |             |             |             |             |             |               |               |              |
| E-0.61%   |             |             |             |             |             |             |               |               |              |
| F-0.18%   |             |             |             |             |             |             |               |               |              |
| REF-0.47% |             |             |             |             |             |             |               |               |              |
| REF-3.08% |             |             |             |             |             |             |               |               |              |
| NS-0.29%  |             |             |             |             |             |             |               |               |              |

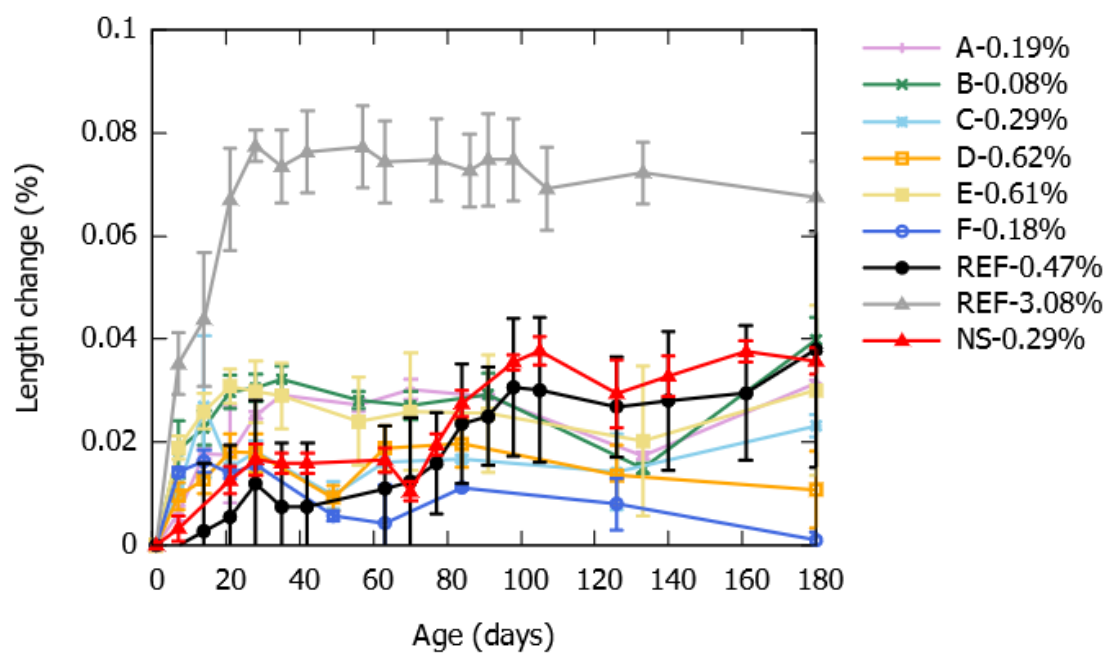

**Figure S1.** Swelling curve corresponding to Figure 3a, shown with error bars.

**Publisher's Note:** MDPI stays neutral with regard to jurisdictional claims in published maps and institutional affiliations.

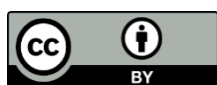

© 2020 by the authors. Submitted for possible open access publication under the terms and conditions of the Creative Commons Attribution (CC BY) license (<http://creativecommons.org/licenses/by/4.0/>).
